# Supplementary material for: Identification of genomic differences between Campylobacter jejuni subsp. jejuni and C. jejuni subsp. doylei at the nap locus leads to the development of a C. jejuni subspeciation multiplex PCR method
Source: PubMed Central journal article supplement (PMC1820782; doi:10.1186/1471-2180-7-11), 2007-02-28
Supplement: 1471-2180-7-11-S1.pdf [file 1471-2180-7-11-S1.pdf]

**Table S1: *Campylobacter* strains used to validate the *nap* multiplex PCR assay.**

| RM#  | Other name | Organism                                                | Source   | Location    | Description            | <i>nap</i> mpx2 bands <sup>a</sup> | <i>lpxA</i> band <sup>a</sup> |
|------|------------|---------------------------------------------------------|----------|-------------|------------------------|------------------------------------|-------------------------------|
| 1051 | ATCC 43479 | <i>C. coli</i>                                          | Human    | Canada      | HS:30                  | 1454, 1016                         | 391                           |
| 1166 | Cc T21     | <i>C. coli</i>                                          | Chicken  | Unknown     | Lior 21                | 1454, 1016                         | 391                           |
| 1505 | ATCC 49299 | <i>C. coli</i>                                          | Unknown  | Unknown     | HS:61                  | 1454, 1016                         | 391                           |
| 1530 | ATCC 43476 | <i>C. coli</i>                                          | Sheep    | USA         | HS:25                  | 1454, 1016                         | 391                           |
| 1531 | ATCC 43478 | <i>C. coli</i>                                          | Marmoset | Unknown     | HS:28                  | 1454, 1016                         | 391                           |
| 1532 | ATCC 43482 | <i>C. coli</i>                                          | Human    | USA         | HS:46                  | 1454, 1016                         | 391                           |
| 1533 | ATCC 43485 | <i>C. coli</i>                                          | Human    | USA         | HS:49                  | 1454, 1016                         | 391                           |
| 1857 | D2611      | <i>C. coli</i>                                          | Human    | Unknown     |                        | 1454, 1016                         | 391                           |
| 1858 | D2699      | <i>C. coli</i>                                          | Human    | Unknown     |                        | 1454, 1016                         | 391                           |
| 1865 | D118       | <i>C. coli</i>                                          | Human    | Unknown     |                        | 1454, 1016                         | 391                           |
| 2228 |            | <i>C. coli</i>                                          | Chicken  | USA         | HS:34; Sequence strain | 1454, 1016                         | 391                           |
| 3273 | ATCC 33237 | <i>C. concisus</i>                                      | Human    | Unknown     | Type strain            | None                               | None                          |
| 3270 | ATCC 35224 | <i>C. curvus</i>                                        | Human    | USA         | Type strain            | None                               | None                          |
| 2088 | D233       | <i>C. fetus</i> subsp. <i>fetus</i>                     | Human    | USA         |                        | None                               | None                          |
| 3226 | ATCC 19438 | <i>C. fetus</i> subsp. <i>venerealis</i>                | Bovine   | Unknown     | Type strain            | None                               | None                          |
| 3268 | ATCC 33236 | <i>C. gracilis</i>                                      | Human    | Unknown     | Type strain            | None                               | None                          |
| 3228 | ATCC 51209 | <i>C. helveticus</i>                                    | Feline   | Switzerland | Type strain            | 1454                               | 206                           |
| 3229 | ATCC 51210 | <i>C. helveticus</i>                                    | Feline   | Switzerland |                        | 1454                               | 206                           |
| 3807 |            | <i>C. helveticus</i>                                    | Feline   | USA (CA)    |                        | 1454                               | 206                           |
| 4087 | CCUG 30566 | <i>C. helveticus</i>                                    | Feline   | Switzerland |                        | 1454                               | 206                           |
| 4088 | CCUG 34016 | <i>C. helveticus</i>                                    | Feline   | Sweden      |                        | 1454                               | 206                           |
| 4139 | CCUG 34042 | <i>C. helveticus</i>                                    | Feline   | Sweden      |                        | 1454                               | 206                           |
| 4140 | CCUG 30563 | <i>C. helveticus</i>                                    | Feline   | Switzerland |                        | 1454                               | 206                           |
| 4141 | CCUG 30564 | <i>C. helveticus</i>                                    | Feline   | Switzerland |                        | 1454                               | 206                           |
| 4142 | CCUG 30683 | <i>C. helveticus</i>                                    | Feline   | Switzerland |                        | 1454                               | 206                           |
| 4093 | 176.96     | <i>C. hyointestinalis</i> subsp. <i>hyointestinalis</i> | Human    | S. Africa   |                        | None                               | None                          |
| 4096 | CCUG 27631 | <i>C. hyointestinalis</i> subsp. <i>lawsonii</i>        | Porcine  | Sweden      |                        | None                               | None                          |
| 1512 | ATCC 49350 | <i>C. jejuni</i> subsp. <i>doylei</i>                   | Human    | Germany     |                        | 973                                | 331                           |
| 1513 | ATCC 49351 | <i>C. jejuni</i> subsp. <i>doylei</i>                   | Human    | Australia   |                        | 973                                | 331                           |

|      |            |                                       |             |           |                        |            |     |
|------|------------|---------------------------------------|-------------|-----------|------------------------|------------|-----|
| 2095 | D2722      | <i>C. jejuni</i> subsp. <i>doylei</i> | Human blood | USA       |                        | 494        | 331 |
| 2096 | D2781      | <i>C. jejuni</i> subsp. <i>doylei</i> | Human       | USA       |                        | 973        | 331 |
| 3782 | 34.02      | <i>C. jejuni</i> subsp. <i>doylei</i> | Human       | S. Africa |                        | 494        | 331 |
| 4097 | SSI 5384   | <i>C. jejuni</i> subsp. <i>doylei</i> | Human       | Denmark   |                        | 494        | 331 |
| 4098 | CCUG 18266 | <i>C. jejuni</i> subsp. <i>doylei</i> | Human       | Germany   |                        | 973        | 331 |
| 4099 | 269.97     | <i>C. jejuni</i> subsp. <i>doylei</i> | Human blood | S. Africa | HS:17; Sequence strain | 494        | 331 |
|      | 168.01     | <i>C. jejuni</i> subsp. <i>doylei</i> | Human       | S. Africa |                        | 494        | 331 |
|      | 88.05      | <i>C. jejuni</i> subsp. <i>doylei</i> | Human       | S. Africa |                        | 494        | 331 |
|      | 170.98     | <i>C. jejuni</i> subsp. <i>doylei</i> | Human blood | S. Africa |                        | 494        | 331 |
|      | 3.03       | <i>C. jejuni</i> subsp. <i>doylei</i> | Human       | S. Africa |                        | 494        | 331 |
|      | 353.97     | <i>C. jejuni</i> subsp. <i>doylei</i> | Human blood | S. Africa | HS:63                  | 494        | 331 |
|      | Mf 62850   | <i>C. jejuni</i> subsp. <i>doylei</i> | Human       | S. Africa |                        | 494        | 331 |
|      | 178.03     | <i>C. jejuni</i> subsp. <i>doylei</i> | Human       | S. Africa |                        | 494        | 331 |
|      | 57.02      | <i>C. jejuni</i> subsp. <i>doylei</i> | Human       | S. Africa |                        | 494        | 331 |
|      | 88.02      | <i>C. jejuni</i> subsp. <i>doylei</i> | Human       | S. Africa |                        | 494        | 331 |
|      | 206.02     | <i>C. jejuni</i> subsp. <i>doylei</i> | Human       | S. Africa |                        | 494        | 331 |
|      | 8.02       | <i>C. jejuni</i> subsp. <i>doylei</i> | Human       | S. Africa |                        | 494        | 331 |
|      | 164.02     | <i>C. jejuni</i> subsp. <i>doylei</i> | Human blood | S. Africa |                        | 494        | 331 |
|      | 175.02     | <i>C. jejuni</i> subsp. <i>doylei</i> | Human       | S. Africa |                        | 494        | 331 |
|      | 77.01      | <i>C. jejuni</i> subsp. <i>doylei</i> | Human       | S. Africa |                        | 1454, 1016 | 331 |
|      | 341.94     | <i>C. jejuni</i> subsp. <i>doylei</i> | Human       | S. Africa |                        | 494        | 331 |
|      | 327.93     | <i>C. jejuni</i> subsp. <i>doylei</i> | Human       | S. Africa |                        | 494        | 331 |
|      | 362.97     | <i>C. jejuni</i> subsp. <i>doylei</i> | Human blood | S. Africa |                        | 494        | 331 |
|      | 340.93     | <i>C. jejuni</i> subsp. <i>doylei</i> | Human       | S. Africa |                        | 494        | 331 |
|      | 317.95     | <i>C. jejuni</i> subsp. <i>doylei</i> | Human       | S. Africa |                        | 494        | 331 |
|      | 260.95     | <i>C. jejuni</i> subsp. <i>doylei</i> | Human       | S. Africa |                        | 494        | 331 |
| 1045 | ATCC 43429 | <i>C. jejuni</i> subsp. <i>jejuni</i> | Human       | Unknown   | HS:1                   | 1454, 1016 | 331 |
| 1046 | ATCC 43430 | <i>C. jejuni</i> subsp. <i>jejuni</i> | Calf        | Unknown   | HS:2                   | 1454, 1016 | 331 |
| 1047 | ATCC 43431 | <i>C. jejuni</i> subsp. <i>jejuni</i> | Human       | Unknown   | HS:3                   | 1454, 1016 | 331 |
| 1048 | ATCC 43432 | <i>C. jejuni</i> subsp. <i>jejuni</i> | Human       | Canada    | HS:4                   | 1454, 1016 | 331 |
| 1049 |            | <i>C. jejuni</i> subsp. <i>jejuni</i> | Human       | Unknown   |                        | 1454, 1016 | 331 |
| 1050 | ATCC 43449 | <i>C. jejuni</i> subsp. <i>jejuni</i> | Human       | Canada    | HS:23                  | 1454, 1016 | 331 |
| 1052 | ATCC 43456 | <i>C. jejuni</i> subsp. <i>jejuni</i> | Human       | Unknown   | HS:36                  | 1454, 1016 | 331 |
| 1155 | CjT1       | <i>C. jejuni</i> subsp. <i>jejuni</i> | Human       | Canada    | Lior 1                 | 1454, 1016 | 331 |
| 1156 | CjT2       | <i>C. jejuni</i> subsp. <i>jejuni</i> | Human       | Canada    | Lior 2                 | 1454, 1016 | 331 |

|      |              |                                       |         |          |                        |            |     |
|------|--------------|---------------------------------------|---------|----------|------------------------|------------|-----|
| 1158 | CjT5         | <i>C. jejuni</i> subsp. <i>jejuni</i> | Human   | Canada   | Lior 5                 | 1454, 1016 | 331 |
| 1160 | CjT7         | <i>C. jejuni</i> subsp. <i>jejuni</i> | Human   | Canada   | Lior 7                 | 1454, 1016 | 331 |
| 1163 | CjT11        | <i>C. jejuni</i> subsp. <i>jejuni</i> | Human   | Israel   | Lior 11                | 1454, 1016 | 331 |
| 1167 | CjT28        | <i>C. jejuni</i> subsp. <i>jejuni</i> | Human   | Canada   | Lior 28                | 1454, 1016 | 331 |
| 1170 | NLEP 02-1971 | <i>C. jejuni</i> subsp. <i>jejuni</i> | Chicken | USA      |                        | 1454, 1016 | 331 |
| 1188 |              | <i>C. jejuni</i> subsp. <i>jejuni</i> | Chicken | USA      |                        | 1454, 1016 | 331 |
| 1221 |              | <i>C. jejuni</i> subsp. <i>jejuni</i> | Chicken | USA (CA) | HS:53; Sequence strain | 1454, 1016 | 331 |
| 1244 | 90A2737      | <i>C. jejuni</i> subsp. <i>jejuni</i> | Human   | USA      |                        | 1454, 1016 | 331 |
| 1245 | 96A5046      | <i>C. jejuni</i> subsp. <i>jejuni</i> | Human   | USA      |                        | 1454, 1016 | 331 |
| 1246 | 92A3120      | <i>C. jejuni</i> subsp. <i>jejuni</i> | Human   | USA      |                        | 1454, 1016 | 331 |
| 1247 | 96A11074     | <i>C. jejuni</i> subsp. <i>jejuni</i> | Human   | USA      |                        | 1454, 1016 | 331 |
| 1248 | 96A14504     | <i>C. jejuni</i> subsp. <i>jejuni</i> | Human   | USA      |                        | 1454, 1016 | 331 |
| 1268 | ATCC 33560   | <i>C. jejuni</i> subsp. <i>jejuni</i> | Bovine  | Unknown  |                        | 1454, 1016 | 331 |
| 1285 |              | <i>C. jejuni</i> subsp. <i>jejuni</i> | Chicken | USA      |                        | 1454, 1016 | 331 |
| 1409 |              | <i>C. jejuni</i> subsp. <i>jejuni</i> | Chicken | USA      |                        | 1454, 1016 | 331 |
| 1413 |              | <i>C. jejuni</i> subsp. <i>jejuni</i> | Chicken | USA      |                        | 1454, 1016 | 331 |
| 1437 |              | <i>C. jejuni</i> subsp. <i>jejuni</i> | Chicken | USA      |                        | 1454, 1016 | 331 |
| 1443 |              | <i>C. jejuni</i> subsp. <i>jejuni</i> | Chicken | USA      |                        | 1454, 1016 | 331 |
| 1449 |              | <i>C. jejuni</i> subsp. <i>jejuni</i> | Chicken | USA      |                        | 1454, 1016 | 331 |
| 1464 |              | <i>C. jejuni</i> subsp. <i>jejuni</i> | Chicken | USA      |                        | 1454, 1016 | 331 |
| 1477 | D445         | <i>C. jejuni</i> subsp. <i>jejuni</i> | Human   | USA      |                        | 1454, 1016 | 331 |
| 1478 | D226         | <i>C. jejuni</i> subsp. <i>jejuni</i> | Human   | USA      |                        | 1454, 1016 | 331 |
| 1479 | EDL18        | <i>C. jejuni</i> subsp. <i>jejuni</i> | Human   | USA      |                        | 1454, 1016 | 331 |
| 1480 | D1117        | <i>C. jejuni</i> subsp. <i>jejuni</i> | Human   | USA      |                        | 1454, 1016 | 331 |
| 1501 |              | <i>C. jejuni</i> subsp. <i>jejuni</i> | Chicken | USA      |                        | 1454, 1016 | 331 |
| 1503 | ATCC 43462   | <i>C. jejuni</i> subsp. <i>jejuni</i> | Human   | Canada   | HS:43                  | 1454, 1016 | 331 |
| 1507 | LCDC 17384   | <i>C. jejuni</i> subsp. <i>jejuni</i> | Human   | Germany  | Lior 16, HS:10         | 1454, 1016 | 331 |
| 1508 | LCDC 17385   | <i>C. jejuni</i> subsp. <i>jejuni</i> | Human   | Germany  | Lior 11, HS:53         | 1454, 1016 | 331 |
| 1510 | LCDC 17402   | <i>C. jejuni</i> subsp. <i>jejuni</i> | Human   | Japan    | HS:19, GBS isolate     | 1454, 1016 | 331 |
| 1511 | LCDC 17403   | <i>C. jejuni</i> subsp. <i>jejuni</i> | Human   | Japan    | HS:19, GBS isolate     | 1454, 1016 | 331 |
| 1516 | ATCC 33560   | <i>C. jejuni</i> subsp. <i>jejuni</i> | Human   | USA      |                        | 1454, 1016 | 331 |
| 1551 | ATCC 43433   | <i>C. jejuni</i> subsp. <i>jejuni</i> | Human   | Unknown  | HS:5                   | 1454, 1016 | 331 |
| 1552 | ATCC 43434   | <i>C. jejuni</i> subsp. <i>jejuni</i> | Human   | Canada   | HS:6                   | 1454, 1016 | 331 |
| 1553 | ATCC 43435   | <i>C. jejuni</i> subsp. <i>jejuni</i> | Human   | Unknown  | HS:7                   | 1454, 1016 | 331 |
| 1554 | ATCC 43436   | <i>C. jejuni</i> subsp. <i>jejuni</i> | Human   | Canada   | HS:8                   | 1454, 1016 | 331 |

|      |            |                                       |         |          |                           |            |     |
|------|------------|---------------------------------------|---------|----------|---------------------------|------------|-----|
| 1555 | ATCC 43437 | <i>C. jejuni</i> subsp. <i>jejuni</i> | Goat    | Unknown  | HS:9                      | 1454, 1016 | 331 |
| 1556 | ATCC 43438 | <i>C. jejuni</i> subsp. <i>jejuni</i> | Human   | Unknown  | HS:10                     | 1454, 1016 | 331 |
| 1844 | D135       | <i>C. jejuni</i> subsp. <i>jejuni</i> | Human   | Canada   |                           | 1454, 1016 | 331 |
| 1845 | D140       | <i>C. jejuni</i> subsp. <i>jejuni</i> | Human   | Japan    |                           | 1454, 1016 | 331 |
| 1846 | D141       | <i>C. jejuni</i> subsp. <i>jejuni</i> | Goat    | Canada   |                           | 1454, 1016 | 331 |
| 1847 | D142       | <i>C. jejuni</i> subsp. <i>jejuni</i> | Sheep   | USA      |                           | 1454, 1016 | 331 |
| 1849 | D781       | <i>C. jejuni</i> subsp. <i>jejuni</i> | Chicken | USA      |                           | 1454, 1016 | 331 |
| 1850 | D983       | <i>C. jejuni</i> subsp. <i>jejuni</i> | Chicken | USA      |                           | 1454, 1016 | 331 |
| 1851 | D1038      | <i>C. jejuni</i> subsp. <i>jejuni</i> | Chicken | USA      |                           | 1454, 1016 | 331 |
| 1852 | D1420      | <i>C. jejuni</i> subsp. <i>jejuni</i> | Chicken | USA      |                           | 1454, 1016 | 331 |
| 1853 | D1713      | <i>C. jejuni</i> subsp. <i>jejuni</i> | Human   | USA      |                           | 1454, 1016 | 331 |
| 1854 | D1916      | <i>C. jejuni</i> subsp. <i>jejuni</i> | Human   | USA      |                           | 1454, 1016 | 331 |
| 1855 | D2583      | <i>C. jejuni</i> subsp. <i>jejuni</i> | Human   | USA      |                           | 1454, 1016 | 331 |
| 1856 | D2589      | <i>C. jejuni</i> subsp. <i>jejuni</i> | Human   | Scotland |                           | 1454, 1016 | 331 |
| 1859 | L17        | <i>C. jejuni</i> subsp. <i>jejuni</i> | Unknown | Unknown  | Lior 17; HS:4,16          | 1454, 1016 | 331 |
| 1860 | L18        | <i>C. jejuni</i> subsp. <i>jejuni</i> | Unknown | Unknown  | Lior 18; HS:55            | 1454, 1016 | 331 |
| 1861 | L19        | <i>C. jejuni</i> subsp. <i>jejuni</i> | Unknown | Unknown  | Lior 19; HS:42,15         | 1454, 1016 | 331 |
| 1862 | NCTC 11168 | <i>C. jejuni</i> subsp. <i>jejuni</i> | Human   | UK       | HS:2; Sequence strain     | 1454, 1016 | 331 |
| 1863 | 81116      | <i>C. jejuni</i> subsp. <i>jejuni</i> | Human   | UK       |                           | 1454, 1016 | 331 |
| 1864 | 81-176     | <i>C. jejuni</i> subsp. <i>jejuni</i> | Human   | USA (MN) | HS:23,36; Sequence strain | 1454, 1016 | 331 |
| 1866 | D1917      | <i>C. jejuni</i> subsp. <i>jejuni</i> | Chicken | USA      |                           | 1454, 1016 | 331 |
| 1881 | ATCC 33291 | <i>C. jejuni</i> subsp. <i>jejuni</i> | Human   | USA (CO) |                           | 1454, 1016 | 331 |
| 1892 | K21        | <i>C. jejuni</i> subsp. <i>jejuni</i> | Chicken | USA      |                           | 1454, 1016 | 331 |
| 1893 | K22        | <i>C. jejuni</i> subsp. <i>jejuni</i> | Chicken | USA      |                           | 1454, 1016 | 331 |
| 1894 | K23        | <i>C. jejuni</i> subsp. <i>jejuni</i> | Chicken | USA      |                           | 1454, 1016 | 331 |
| 1895 | K24        | <i>C. jejuni</i> subsp. <i>jejuni</i> | Chicken | USA      |                           | 1454, 1016 | 331 |
| 1910 | K20        | <i>C. jejuni</i> subsp. <i>jejuni</i> | Chicken | USA      |                           | 1454, 1016 | 331 |
| 2226 | 72237      | <i>C. jejuni</i> subsp. <i>jejuni</i> | Chicken | USA      |                           | 1454, 1016 | 331 |
| 2227 | 72522      | <i>C. jejuni</i> subsp. <i>jejuni</i> | Chicken | USA      |                           | 1454, 1016 | 331 |
| 2229 | 72737      | <i>C. jejuni</i> subsp. <i>jejuni</i> | Chicken | USA      |                           | 1454, 1016 | 331 |
| 2232 | 72927      | <i>C. jejuni</i> subsp. <i>jejuni</i> | Chicken | USA      |                           | 1454, 1016 | 331 |
| 2233 | 72934      | <i>C. jejuni</i> subsp. <i>jejuni</i> | Chicken | USA      |                           | 1454, 1016 | 331 |
| 2239 | 75009      | <i>C. jejuni</i> subsp. <i>jejuni</i> | Chicken | USA      |                           | 1454, 1016 | 331 |
| 2240 | 75059      | <i>C. jejuni</i> subsp. <i>jejuni</i> | Chicken | USA      |                           | 1454, 1016 | 331 |

|      |         |                                       |         |           |                       |            |     |
|------|---------|---------------------------------------|---------|-----------|-----------------------|------------|-----|
| 2241 | 75284   | <i>C. jejuni</i> subsp. <i>jejuni</i> | Chicken | USA       |                       | 1454, 1016 | 331 |
| 2769 |         | <i>C. jejuni</i> subsp. <i>jejuni</i> | Chicken | USA       |                       | 1454, 1016 | 331 |
| 2872 |         | <i>C. jejuni</i> subsp. <i>jejuni</i> | Chicken | USA       |                       | 1454, 1016 | 331 |
| 2873 |         | <i>C. jejuni</i> subsp. <i>jejuni</i> | Chicken | USA       |                       | 1454, 1016 | 331 |
| 3145 | HB93-13 | <i>C. jejuni</i> subsp. <i>jejuni</i> | Human   | China     | HS:19; GBS isolate    | 1454, 1016 | 331 |
| 3146 | HB93-29 | <i>C. jejuni</i> subsp. <i>jejuni</i> | Human   | China     | HS:19; GBS isolate    | 1454, 1016 | 331 |
| 3147 | INP7    | <i>C. jejuni</i> subsp. <i>jejuni</i> | Human   | Mexico    | HS:19; GBS isolate    | 1454, 1016 | 331 |
| 3148 | INP21   | <i>C. jejuni</i> subsp. <i>jejuni</i> | Human   | Mexico    | HS:19; GBS isolate    | 1454, 1016 | 331 |
| 3149 | INP59   | <i>C. jejuni</i> subsp. <i>jejuni</i> | Human   | Mexico    | HS:41; GBS isolate    | 1454, 1016 | 331 |
| 3193 | 290.94  | <i>C. jejuni</i> subsp. <i>jejuni</i> | Human   | S. Africa | HS:41; GBS isolate    | 1454, 1016 | 331 |
| 3194 | 285.94  | <i>C. jejuni</i> subsp. <i>jejuni</i> | Human   | S. Africa |                       | 1454, 1016 | 331 |
| 3196 | 233.94  | <i>C. jejuni</i> subsp. <i>jejuni</i> | Human   | S. Africa | HS:41; GBS isolate    | 1454, 1016 | 331 |
| 3197 | 308.95  | <i>C. jejuni</i> subsp. <i>jejuni</i> | Human   | S. Africa | HS:41; GBS isolate    | 1454, 1016 | 331 |
| 3198 | 367.95  | <i>C. jejuni</i> subsp. <i>jejuni</i> | Human   | S. Africa | HS:41; GBS isolate    | 1454, 1016 | 331 |
| 3199 | 370.95  | <i>C. jejuni</i> subsp. <i>jejuni</i> | Human   | S. Africa | HS:41; GBS isolate    | 1454, 1016 | 331 |
| 3200 | 302.96  | <i>C. jejuni</i> subsp. <i>jejuni</i> | Human   | S. Africa | HS:33                 | 1454, 1016 | 331 |
| 3201 | 378.96  | <i>C. jejuni</i> subsp. <i>jejuni</i> | Human   | S. Africa | HS:41                 | 1454, 1016 | 331 |
| 3202 | 386.96  | <i>C. jejuni</i> subsp. <i>jejuni</i> | Human   | S. Africa | HS:41                 | 1454, 1016 | 331 |
| 3203 | 16.97   | <i>C. jejuni</i> subsp. <i>jejuni</i> | Human   | S. Africa | HS:12                 | 1454, 1016 | 331 |
| 3204 | 20.97   | <i>C. jejuni</i> subsp. <i>jejuni</i> | Human   | S. Africa | HS:12                 | 1454, 1016 | 331 |
| 3205 | 199.97  | <i>C. jejuni</i> subsp. <i>jejuni</i> | Human   | S. Africa | HS:41                 | 1454, 1016 | 331 |
| 3206 | 231.97  | <i>C. jejuni</i> subsp. <i>jejuni</i> | Human   | S. Africa | HS:8,17               | 1454, 1016 | 331 |
| 3207 | 250.97  | <i>C. jejuni</i> subsp. <i>jejuni</i> | Human   | S. Africa | HS:41                 | 1454, 1016 | 331 |
| 3208 | 1.98    | <i>C. jejuni</i> subsp. <i>jejuni</i> | Human   | S. Africa | HS:21                 | 1454, 1016 | 331 |
| 3209 | 24.98   | <i>C. jejuni</i> subsp. <i>jejuni</i> | Human   | S. Africa | HS:12                 | 1454, 1016 | 331 |
| 3210 | 242.98  | <i>C. jejuni</i> subsp. <i>jejuni</i> | Human   | S. Africa | HS:41                 | 1454, 1016 | 331 |
| 3211 | 96      | <i>C. jejuni</i> subsp. <i>jejuni</i> | Human   | S. Africa |                       | 1454, 1016 | 331 |
| 3264 | 17387   | <i>C. jejuni</i> subsp. <i>jejuni</i> | Human   | Canada    | GBS isolate           | 1454, 1016 | 331 |
| 3265 | 98-1718 | <i>C. jejuni</i> subsp. <i>jejuni</i> | Human   | Canada    | GBS isolate           | 1454, 1016 | 331 |
| 3266 | 17714   | <i>C. jejuni</i> subsp. <i>jejuni</i> | Human   | Canada    | GBS isolate           | 1454, 1016 | 331 |
| 3405 |         | <i>C. jejuni</i> subsp. <i>jejuni</i> | Unknown | Unknown   | HS:1 reference strain | 1454, 1016 | 331 |
| 3406 |         | <i>C. jejuni</i> subsp. <i>jejuni</i> | Unknown | Unknown   | HS:2 reference strain | 1454, 1016 | 331 |
| 3407 |         | <i>C. jejuni</i> subsp. <i>jejuni</i> | Unknown | Unknown   | HS:3 reference strain | 1454, 1016 | 331 |
| 3408 |         | <i>C. jejuni</i> subsp. <i>jejuni</i> | Unknown | Unknown   | HS:4 reference strain | 1454, 1016 | 331 |
| 3409 |         | <i>C. jejuni</i> subsp. <i>jejuni</i> | Unknown | Unknown   | HS:5 reference strain | 1454, 1016 | 331 |

|      |                                       |         |          |                        |            |     |
|------|---------------------------------------|---------|----------|------------------------|------------|-----|
| 3410 | <i>C. jejuni</i> subsp. <i>jejuni</i> | Unknown | Unknown  | HS:6 reference strain  | 1454, 1016 | 331 |
| 3411 | <i>C. jejuni</i> subsp. <i>jejuni</i> | Unknown | Unknown  | HS:7 reference strain  | 1454, 1016 | 331 |
| 3412 | <i>C. jejuni</i> subsp. <i>jejuni</i> | Unknown | Unknown  | HS:8 reference strain  | 1454, 1016 | 331 |
| 3413 | <i>C. jejuni</i> subsp. <i>jejuni</i> | Unknown | Unknown  | HS:9 reference strain  | 1454, 1016 | 331 |
| 3414 | <i>C. jejuni</i> subsp. <i>jejuni</i> | Unknown | Unknown  | HS:10 reference strain | 1454, 1016 | 331 |
| 3415 | <i>C. jejuni</i> subsp. <i>jejuni</i> | Unknown | Unknown  | HS:11 reference strain | 1454, 1016 | 331 |
| 3416 | <i>C. jejuni</i> subsp. <i>jejuni</i> | Unknown | Unknown  | HS:13 reference strain | 1454, 1016 | 331 |
| 3417 | <i>C. jejuni</i> subsp. <i>jejuni</i> | Unknown | Unknown  | HS:16 reference strain | 1454, 1016 | 331 |
| 3418 | <i>C. jejuni</i> subsp. <i>jejuni</i> | Unknown | Unknown  | HS:17 reference strain | 1454, 1016 | 331 |
| 3419 | <i>C. jejuni</i> subsp. <i>jejuni</i> | Unknown | Unknown  | HS:18 reference strain | 1454, 1016 | 331 |
| 3421 | <i>C. jejuni</i> subsp. <i>jejuni</i> | Unknown | Unknown  | HS:22 reference strain | 1454, 1016 | 331 |
| 3422 | <i>C. jejuni</i> subsp. <i>jejuni</i> | Unknown | Unknown  | HS:23 reference strain | 1454, 1016 | 331 |
| 3423 | <i>C. jejuni</i> subsp. <i>jejuni</i> | Unknown | Unknown  | HS:27 reference strain | 1454, 1016 | 331 |
| 3424 | <i>C. jejuni</i> subsp. <i>jejuni</i> | Unknown | Unknown  | HS:29 reference strain | 1454, 1016 | 331 |
| 3425 | <i>C. jejuni</i> subsp. <i>jejuni</i> | Unknown | Unknown  | HS:32 reference strain | 1454, 1016 | 331 |
| 3426 | <i>C. jejuni</i> subsp. <i>jejuni</i> | Unknown | Unknown  | HS:35 reference strain | 1454, 1016 | 331 |
| 3427 | <i>C. jejuni</i> subsp. <i>jejuni</i> | Unknown | Unknown  | HS:36 reference strain | 1454, 1016 | 331 |
| 3428 | <i>C. jejuni</i> subsp. <i>jejuni</i> | Unknown | Unknown  | HS:37 reference strain | 1454, 1016 | 331 |
| 3429 | <i>C. jejuni</i> subsp. <i>jejuni</i> | Unknown | Unknown  | HS:38 reference strain | 1454, 1016 | 331 |
| 3430 | <i>C. jejuni</i> subsp. <i>jejuni</i> | Unknown | Unknown  | HS:41 reference strain | 1454, 1016 | 331 |
| 3431 | <i>C. jejuni</i> subsp. <i>jejuni</i> | Unknown | Unknown  | HS:44 reference strain | 1454, 1016 | 331 |
| 3432 | <i>C. jejuni</i> subsp. <i>jejuni</i> | Unknown | Unknown  | HS:45 reference strain | 1454, 1016 | 331 |
| 3433 | <i>C. jejuni</i> subsp. <i>jejuni</i> | Unknown | Unknown  | HS:50 reference strain | 1454, 1016 | 331 |
| 3434 | <i>C. jejuni</i> subsp. <i>jejuni</i> | Unknown | Unknown  | HS:52 reference strain | 1454, 1016 | 331 |
| 3435 | <i>C. jejuni</i> subsp. <i>jejuni</i> | Unknown | Unknown  | HS:53 reference strain | 1454, 1016 | 331 |
| 3436 | <i>C. jejuni</i> subsp. <i>jejuni</i> | Unknown | Unknown  | HS:57 reference strain | 1454, 1016 | 331 |
| 3437 | <i>C. jejuni</i> subsp. <i>jejuni</i> | Unknown | Unknown  | HS:58 reference strain | 1454, 1016 | 331 |
| 3438 | <i>C. jejuni</i> subsp. <i>jejuni</i> | Unknown | Unknown  | HS:60 reference strain | 1454, 1016 | 331 |
| 3439 | <i>C. jejuni</i> subsp. <i>jejuni</i> | Unknown | Unknown  | HS:62 reference strain | 1454, 1016 | 331 |
| 3440 | <i>C. jejuni</i> subsp. <i>jejuni</i> | Unknown | Unknown  | HS:63 reference strain | 494        | 331 |
| 3441 | <i>C. jejuni</i> subsp. <i>jejuni</i> | Unknown | Unknown  | HS:64 reference strain | 1454, 1016 | 331 |
| 3442 | <i>C. jejuni</i> subsp. <i>jejuni</i> | Unknown | Unknown  | HS:65 reference strain | 1454, 1016 | 331 |
| 3664 | <i>C. jejuni</i> subsp. <i>jejuni</i> | Goose   | USA (CA) |                        | 1454, 1016 | 331 |
| 3665 | <i>C. jejuni</i> subsp. <i>jejuni</i> | Goose   | USA (CA) |                        | 1454, 1016 | 331 |
| 3666 | <i>C. jejuni</i> subsp. <i>jejuni</i> | Goose   | USA (CA) |                        | 1454, 1016 | 331 |

|      |            |                                       |             |             |             |            |      |
|------|------------|---------------------------------------|-------------|-------------|-------------|------------|------|
| 3667 |            | <i>C. jejuni</i> subsp. <i>jejuni</i> | Goose       | USA (CA)    |             | 1454, 1016 | 331  |
| 3668 |            | <i>C. jejuni</i> subsp. <i>jejuni</i> | Goose       | USA (CA)    |             | 1454, 1016 | 331  |
| 3669 |            | <i>C. jejuni</i> subsp. <i>jejuni</i> | Goose       | USA (CA)    |             | 1454, 1016 | 331  |
| 3670 |            | <i>C. jejuni</i> subsp. <i>jejuni</i> | Goose       | USA (CA)    |             | 1454, 1016 | 331  |
| 3672 |            | <i>C. jejuni</i> subsp. <i>jejuni</i> | Goose       | USA (CA)    |             | 1454, 1016 | 331  |
| 3673 |            | <i>C. jejuni</i> subsp. <i>jejuni</i> | Goose       | USA (CA)    |             | 1454, 1016 | 331  |
| 3674 |            | <i>C. jejuni</i> subsp. <i>jejuni</i> | Goose       | USA (CA)    |             | 1454, 1016 | 331  |
| 4767 | 6893       | <i>C. jejuni</i> subsp. <i>jejuni</i> | Human       | Canada (BC) |             | 1454, 1016 | 331  |
| 4768 | 6894       | <i>C. jejuni</i> subsp. <i>jejuni</i> | Human       | Canada (BC) |             | 1454, 1016 | 331  |
| 4769 | 6895       | <i>C. jejuni</i> subsp. <i>jejuni</i> | Human       | Canada (BC) |             | 1454, 1016 | 331  |
| 4770 | 6574       | <i>C. jejuni</i> subsp. <i>jejuni</i> | Human       | Canada (ON) |             | 1454, 1016 | 331  |
| 4771 | 6575       | <i>C. jejuni</i> subsp. <i>jejuni</i> | Human       | Canada (ON) |             | 1454, 1016 | 331  |
| 4772 | 6576       | <i>C. jejuni</i> subsp. <i>jejuni</i> | Human       | Canada (ON) |             | 1454, 1016 | 331  |
| 3663 | NCTC 13004 | <i>C. lari</i> subsp. <i>lanienae</i> | Unknown     | UK          | Type strain | None       | None |
| 1887 | ATCC 35223 | <i>C. lari</i>                        | Human       | Unknown     |             | 1454       | 235  |
| 1890 | ATCC 43675 | <i>C. lari</i>                        | Human       | Unknown     |             | 1454       | 235  |
| 2100 | D67        | <i>C. lari</i>                        | Human       | USA         |             | 1454       | 235  |
| 2808 | ATCC 35221 | <i>C. lari</i>                        | Unknown     | Unknown     |             | 1454       | 235  |
| 2809 | ATCC 35222 | <i>C. lari</i>                        | Unknown     | Unknown     |             | 1454       | 235  |
| 2810 | ATCC 43675 | <i>C. lari</i>                        | Unknown     | Unknown     |             | 1454       | 235  |
| 2816 | LMG 8844   | <i>C. lari</i>                        | Seawater    | UK          |             | 1454       | 235  |
| 2817 | LMG 9152   | <i>C. lari</i>                        | Horse       | Sweden      |             | 1454       | 235  |
| 2818 | LMG 9253   | <i>C. lari</i>                        | Human       | Unknown     |             | 1454       | 235  |
| 2819 | LMG 9887   | <i>C. lari</i>                        | Seagull     | Unknown     |             | 1454       | 235  |
| 2820 | LMG 9888   | <i>C. lari</i>                        | Seagull     | Unknown     |             | 1454       | 235  |
| 2821 | LMG 9889   | <i>C. lari</i>                        | Seagull     | Unknown     |             | 1454       | 235  |
| 2822 | LMG 9913   | <i>C. lari</i>                        | Human       | Unknown     |             | 1454       | 235  |
| 2823 | LMG 9914   | <i>C. lari</i>                        | Human       | Unknown     |             | 1454       | 235  |
| 2824 | LMG 11251  | <i>C. lari</i>                        | Unknown     | Unknown     |             | 1454       | 235  |
| 2825 | LMG 11760  | <i>C. lari</i>                        | Human       | Canada      |             | 1454       | 235  |
| 2826 | LMG 14338  | <i>C. lari</i>                        | Human       | Belgium     |             | 1454       | 235  |
| 3659 | NCTC 11845 | <i>C. lari</i>                        | River water | UK          | UPTC        | None       | 235  |
| 3660 | NCTC 11928 | <i>C. lari</i>                        | River water | UK          | UPTC        | 1454       | 235  |
| 3661 | NCTC 11937 | <i>C. lari</i>                        | Unknown     | UK          | UPTC        | None       | 235  |
| 4110 | CCUG 22395 | <i>C. lari</i>                        | Human       | France      | UPTC        | 1454       | 235  |

|      |            |                                               |         |           |             |            |      |
|------|------------|-----------------------------------------------|---------|-----------|-------------|------------|------|
| 3233 | ATCC 43265 | <i>C. mucosalis</i>                           | Porcine | Unknown   |             | None       | None |
| 3234 | ATCC 43264 | <i>C. mucosalis</i>                           | Porcine | Unknown   | Type strain | ~1100      | None |
| 3235 |            | <i>C. mucosalis</i>                           | Unknown | Unknown   |             | None       | None |
| 4113 | CCUG 21559 | <i>C. mucosalis</i>                           | Porcine | Scotland  | Serotype A  | None       | None |
| 4114 | CCUG 23201 | <i>C. mucosalis</i>                           | Porcine | Scotland  | Serotype B  | None       | None |
| 3267 | ATCC 33238 | <i>C. rectus</i>                              | Human   | Unknown   | Type strain | None       | None |
| 3277 | ATCC 51146 | <i>C. showae</i>                              | Human   | Japan     | Type strain | None       | None |
| 4121 | CCUG 20703 | <i>C. sputorum</i> bv. <i>faecalis</i>        | Sheep   | UK        |             | 1454       | None |
| 4120 | LMG 11764  | <i>C. sputorum</i> bv. <i>paraureolyticus</i> | Human   | Canada    |             | None       | None |
| 3237 | ATCC 51146 | <i>C. sputorum</i> bv. <i>sputorum</i>        | Human   | Brazil    |             | 1454       | None |
| 4119 | 86.92      | <i>C. sputorum</i> bv. <i>sputorum</i>        | Human   | S. Africa |             | 1454       | None |
| 1488 | ATCC 49815 | <i>C. upsaliensis</i>                         | Human   | Canada    |             | 1454, 1016 | 206  |
| 2089 | D1137      | <i>C. upsaliensis</i>                         | Sheep   | Unknown   |             | 1454, 1016 | 206  |
| 2092 | D1673      | <i>C. upsaliensis</i>                         | Human   | Unknown   |             | 1454, 1016 | 206  |
| 2093 | D1178      | <i>C. upsaliensis</i>                         | Human   | USA       |             | 1454, 1016 | 206  |
| 2094 | D2237      | <i>C. upsaliensis</i>                         | Human   | USA       |             | 1454, 1016 | 206  |
| 3195 | 300.94     | <i>C. upsaliensis</i>                         | Human   | S. Africa |             | 1016       | 206  |
| 3776 | 365.96     | <i>C. upsaliensis</i>                         | Human   | S. Africa |             | 1016       | 206  |
| 3777 | 3.97       | <i>C. upsaliensis</i>                         | Human   | S. Africa |             | None       | 206  |
| 3778 | 5.97       | <i>C. upsaliensis</i>                         | Human   | S. Africa |             | 1454, 1016 | 206  |
| 3779 | 1.02       | <i>C. upsaliensis</i>                         | Human   | S. Africa |             | 1016       | 206  |
| 3780 | 18.02      | <i>C. upsaliensis</i>                         | Human   | S. Africa |             | 1016       | 206  |
| 3781 | 21.02      | <i>C. upsaliensis</i>                         | Human   | S. Africa |             | 1016       | 206  |
| 3782 | 34.02      | <i>C. upsaliensis</i>                         | Human   | S. Africa |             | None       | 206  |
| 3783 | 68.02      | <i>C. upsaliensis</i>                         | Human   | S. Africa |             | 1016       | 206  |
| 3784 | 162.02     | <i>C. upsaliensis</i>                         | Human   | S. Africa |             | 1016       | 206  |
| 3785 | 26.03      | <i>C. upsaliensis</i>                         | Human   | S. Africa |             | 1016       | 206  |
| 3786 | 37.03      | <i>C. upsaliensis</i>                         | Human   | S. Africa |             | 1016       | 206  |
| 3810 |            | <i>C. upsaliensis</i>                         | Feline  | USA (CA)  |             | 1454, 1016 | 206  |
| 3937 | 003        | <i>C. upsaliensis</i>                         | Human   | USA (CA)  |             | 1454, 1016 | 206  |
| 3939 | 021        | <i>C. upsaliensis</i>                         | Human   | USA (CA)  |             | 1454, 1016 | 206  |
| 3940 | 054        | <i>C. upsaliensis</i>                         | Human   | USA (CA)  |             | 1454, 1016 | 206  |
| 3941 | 058        | <i>C. upsaliensis</i>                         | Human   | USA (CA)  |             | 1016       | 206  |
| 3942 | 0675       | <i>C. upsaliensis</i>                         | Human   | USA (CA)  |             | 1016       | 206  |



|      |            |                       |               |           |             |            |     |
|------|------------|-----------------------|---------------|-----------|-------------|------------|-----|
| 3943 | 1419       | <i>C. upsaliensis</i> | Human         | USA (CA)  |             | 1016       | 206 |
| 3944 | 3846       | <i>C. upsaliensis</i> | Human         | USA (CA)  |             | 1454, 1016 | 206 |
| 3945 | 1882       | <i>C. upsaliensis</i> | Canine        | USA (CA)  |             | 1454, 1016 | 206 |
| 3946 | 1883       | <i>C. upsaliensis</i> | Canine        | USA (CA)  |             | 1016       | 206 |
| 3947 | 1884       | <i>C. upsaliensis</i> | Canine        | USA (CA)  |             | 1454, 1016 | 206 |
| 3948 | 1885       | <i>C. upsaliensis</i> | Canine        | USA (CA)  |             | 1016       | 206 |
| 3949 | 2041       | <i>C. upsaliensis</i> | Canine        | USA (CA)  |             | 1454, 1016 | 206 |
| 3950 | 2042A      | <i>C. upsaliensis</i> | Canine        | USA (CA)  |             | 1454, 1016 | 206 |
| 4039 | 181.00     | <i>C. upsaliensis</i> | Unknown       | S. Africa |             | 1016       | 206 |
| 4040 | 101.01     | <i>C. upsaliensis</i> | Unknown       | S. Africa |             | 1016       | 206 |
| 4042 | 106.01     | <i>C. upsaliensis</i> | Unknown       | S. Africa |             | 1016       | 206 |
| 4043 | 109.01     | <i>C. upsaliensis</i> | Unknown       | S. Africa |             | 1016       | 206 |
| 4044 | 112.01     | <i>C. upsaliensis</i> | Unknown       | S. Africa |             | 1016       | 206 |
| 4046 | 130.01     | <i>C. upsaliensis</i> | Unknown       | S. Africa |             | 1016       | 206 |
| 4047 | 155.01     | <i>C. upsaliensis</i> | Unknown       | S. Africa |             | 1016       | 206 |
| 4048 | 3.97       | <i>C. upsaliensis</i> | Unknown       | S. Africa |             | 1016       | 206 |
| 4049 | 283.02     | <i>C. upsaliensis</i> | Unknown       | S. Africa |             | 1016       | 206 |
| 4051 | 78.03      | <i>C. upsaliensis</i> | Unknown       | S. Africa |             | 1454, 1016 | 206 |
| 4055 | 173.92     | <i>C. upsaliensis</i> | Human         | S. Africa |             | 1454, 1016 | 206 |
| 4058 | 420.92     | <i>C. upsaliensis</i> | Unknown       | S. Africa |             | 1016       | 206 |
| 4059 | 430.92     | <i>C. upsaliensis</i> | Human         | S. Africa |             | 1016       | 206 |
| 4061 | 131.01     | <i>C. upsaliensis</i> | Human         | S. Africa |             | 1016       | 206 |
| 4062 | 152.01     | <i>C. upsaliensis</i> | Human         | S. Africa |             | 1016       | 206 |
| 4063 | 164.01     | <i>C. upsaliensis</i> | Human         | S. Africa |             | 1016       | 206 |
| 4064 | 169.01     | <i>C. upsaliensis</i> | Human         | S. Africa |             | 1016       | 206 |
| 4065 | 171.01     | <i>C. upsaliensis</i> | Human         | S. Africa |             | 1016       | 206 |
| 4066 | 118.03     | <i>C. upsaliensis</i> | Human         | S. Africa |             | 1016       | 206 |
| 4068 | 137.03     | <i>C. upsaliensis</i> | Human         | S. Africa |             | 1016       | 206 |
| 4069 | 145.03     | <i>C. upsaliensis</i> | Human         | S. Africa |             | None       | 206 |
| 4123 | CCUG 19559 | <i>C. upsaliensis</i> | Human         | UK        |             | 1454, 1016 | 206 |
| 4124 | CCUG 19607 | <i>C. upsaliensis</i> | Canine        | Sweden    |             | 1454, 1016 | 206 |
| 4133 | CCUG 14913 | <i>C. upsaliensis</i> | Canine        | Sweden    | Type strain | 1454, 1016 | 206 |
| 4134 | CCUG 23017 | <i>C. upsaliensis</i> | Human         | France    |             | 1016       | 206 |
| 4135 | CCUG 20818 | <i>C. upsaliensis</i> | Human         | USA       |             | 1454, 1016 | 206 |
| 4136 | CCUG 33890 | <i>C. upsaliensis</i> | Canine/Feline | Sweden    |             | 1016       | 206 |

|      |           |                       |         |          |            |     |
|------|-----------|-----------------------|---------|----------|------------|-----|
| 4137 | Abdn F511 | <i>C. upsaliensis</i> | Unknown | Scotland | 1454, 1016 | 206 |
| 4244 | LMG 9104  | <i>C. upsaliensis</i> | Human   | Belgium  | 1016       | 206 |
| 4245 | LMG 9108  | <i>C. upsaliensis</i> | Human   | Belgium  | 1016       | 206 |
| 4246 | LMG 9114  | <i>C. upsaliensis</i> | Human   | Belgium  | 1016       | 206 |
| 4248 | LMG 9125  | <i>C. upsaliensis</i> | Human   | Belgium  | 1016       | 206 |
| 4249 | LMG 9129  | <i>C. upsaliensis</i> | Human   | Belgium  | 1016       | 206 |
| 4250 | LMG 9140  | <i>C. upsaliensis</i> | Human   | Belgium  | 1016       | 206 |
| 4251 | LMG 9222  | <i>C. upsaliensis</i> | Human   | Belgium  | 1016       | 206 |
| 4252 | LMG 9226  | <i>C. upsaliensis</i> | Human   | Belgium  | 1016       | 206 |
| 4253 | LMG 9230  | <i>C. upsaliensis</i> | Human   | Belgium  | 1016       | 206 |
| 4255 | LMG 9240  | <i>C. upsaliensis</i> | Human   | Belgium  | 1454, 1016 | 206 |
| 4256 | LMG 9261  | <i>C. upsaliensis</i> | Human   | Belgium  | 1016       | 206 |
| 4257 | LMG 9265  | <i>C. upsaliensis</i> | Human   | Belgium  | 1016       | 206 |
| 4258 | LMG 9269  | <i>C. upsaliensis</i> | Human   | Belgium  | 1016       | 206 |

---

a. Band sizes are in bp.
